# Supplementary material for: Metabolomic and Gene Expression Profiles Exhibit Modular Genetic and Dietary Structure Linking Metabolic Syndrome Phenotypes in Drosophila
Source: PubMed Central journal article supplement (PMC4683653; doi:10.1534/g3.115.023564), 2015-11-03
Supplement: supp_g3.115.023564_FigureS2.pdf [file supp_g3.115.023564_FigureS2.pdf]

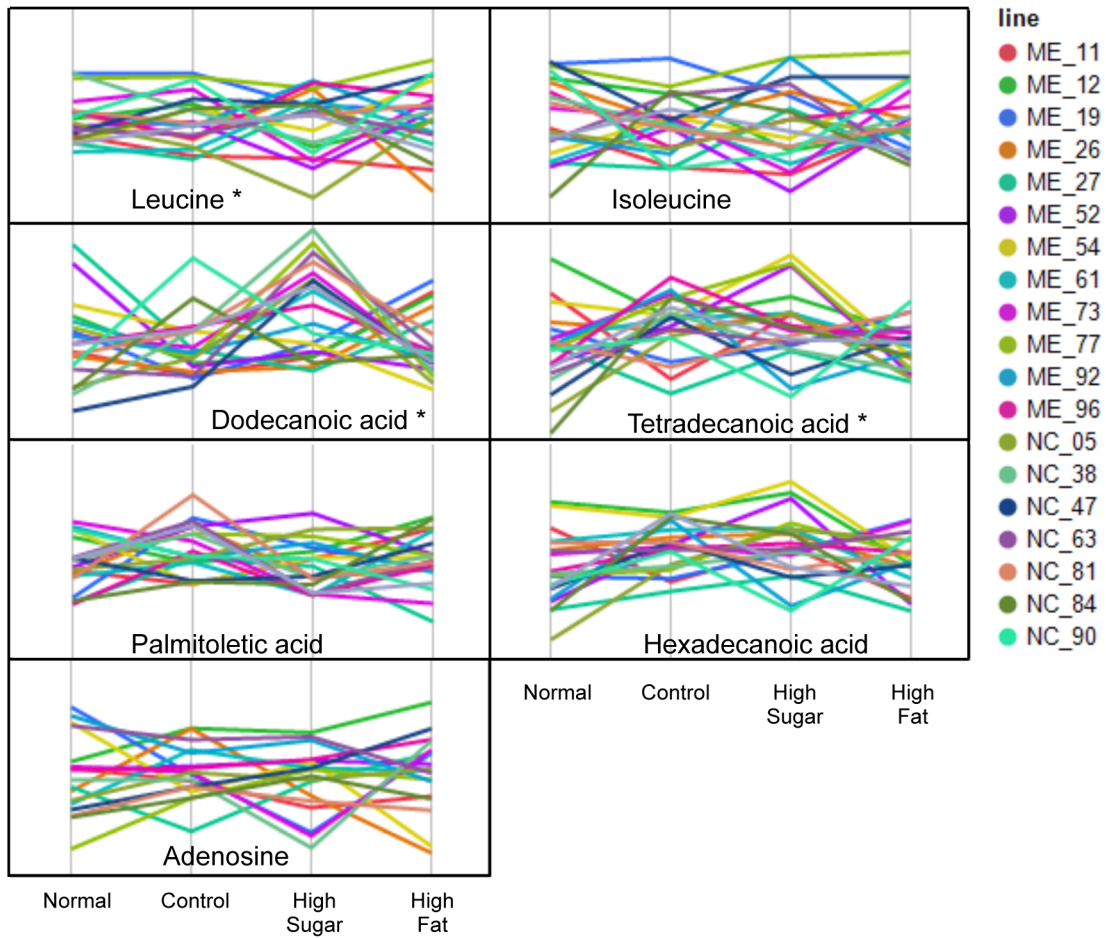

**Figure S2. Metabolites with significant genotype-by-diet interaction effect and confirmed identities.** Significance determined at  $p < 0.01$ , \* indicates Bonferroni significance. Significant metabolites include branch chain amino acids (leucine and isoleucine), long chain saturated fatty acids (dodecanoic, tetradecanoic, hexadecanoic), an omega-7 mono-unsaturated fatty acid (palmitoleic), and a purine nucleoside (adenosine).
