# Supplementary material for: Metabolomic and Gene Expression Profiles Exhibit Modular Genetic and Dietary Structure Linking Metabolic Syndrome Phenotypes in Drosophila
Source: PubMed Central journal article supplement (PMC4683653; doi:10.1534/g3.115.023564), 2015-11-03
Supplement: supp_g3.115.023564_FigureS3.pdf [file supp_g3.115.023564_FigureS3.pdf]

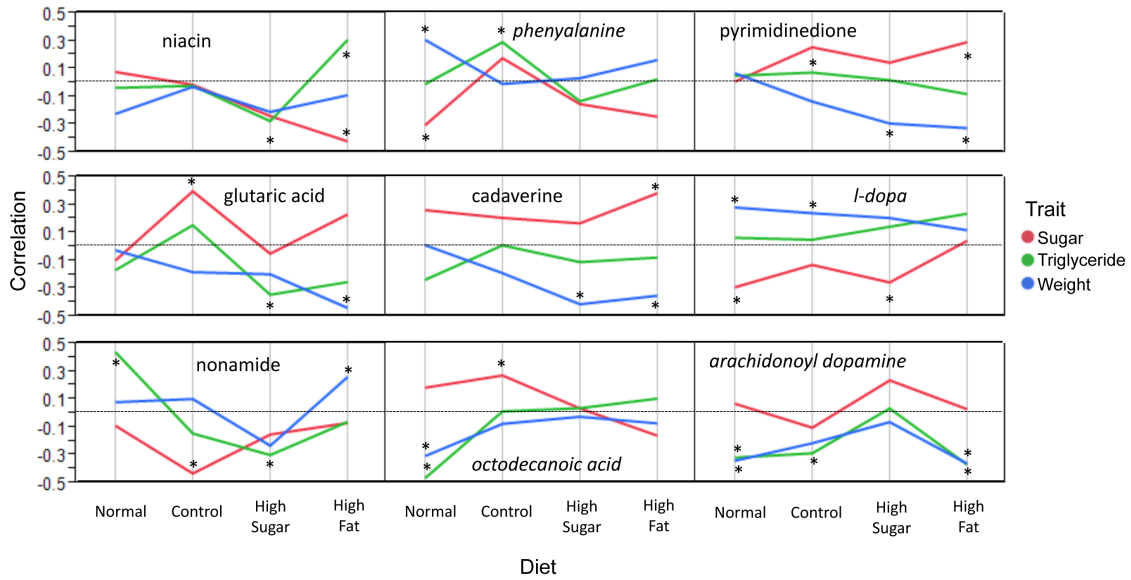

**Figure S3. Metabolites showing strong correlation with weight, triglycerides, or total sugar.** Names indicated in italics are experimentally confirmed identities. Values above the dashed line at 0 indicate a positive correlation, while values below the dashed line indicate a negative correlation. \* indicates a significant correlation at  $p < 0.01$ .
