# Supplementary material for: Metabolomic and Gene Expression Profiles Exhibit Modular Genetic and Dietary Structure Linking Metabolic Syndrome Phenotypes in Drosophila
Source: PubMed Central journal article supplement (PMC4683653; doi:10.1534/g3.115.023564), 2015-11-03
Supplement: supp_g3.115.023564_TableS1.pdf [file supp_g3.115.023564_TableS1.pdf]

Table S1. GO analysis for significant ANOVA transcripts

| <u>ANOVA Term</u> | <u>Number of Transcripts Significant at FDR 0.05</u> | <u>Top 3 GO Functional Categories (# of genes in cluster, enrichment score)</u><br><u>Genetic effect is only the 500 most significant genes</u> | <u>Kegg</u>                                                                                                                                                            |
|-------------------|------------------------------------------------------|-------------------------------------------------------------------------------------------------------------------------------------------------|------------------------------------------------------------------------------------------------------------------------------------------------------------------------|
| Genetic           | 9908                                                 | Metal ion binding/Oxidation reduction (122, 9.47)<br>Metabolism of xenobiotics by cytochrome P450 (23, 4.68)<br>Hydrolysis/peptidase (79, 4.53) | Limonene and pinene degradation<br>Metabolism of xenobiotics by cytochrome P450<br>Drug metabolism<br>Glutathione metabolism<br>Retinol metabolism                     |
| Diet              | 311                                                  | Phospholipase activity/lipase activity (14, 2.94)<br>CHK/choline kinase like (7, 2.65)<br>Oxidation reduction (35, 2.59)                        | Glycerophospholipid metabolism<br>Limonene and pinene degradation<br>alpha-Linolenic acid metabolism<br>Tyrosine metabolism<br>Biosynthesis of unsaturated fatty acids |
| Genetic*<br>Diet  | 40                                                   | Puparial adhesion/salivary gland (8, 4.45)<br>Phagocytosis, engulfment (4, 1.53)                                                                | none                                                                                                                                                                   |
