# Supplementary material for: Metabolomic and Gene Expression Profiles Exhibit Modular Genetic and Dietary Structure Linking Metabolic Syndrome Phenotypes in Drosophila
Source: PubMed Central journal article supplement (PMC4683653; doi:10.1534/g3.115.023564), 2015-11-03
Supplement: supp_g3.115.023564_TableS2.pdf [file supp_g3.115.023564_TableS2.pdf]

Table S2. Distribution of metabolite categories with significant genetic, dietary, and genotype\*diet effects

|                                                          |                | <u>Metabolite Category</u> |       |                      |                        |         |                |              |              |                 |               |
|----------------------------------------------------------|----------------|----------------------------|-------|----------------------|------------------------|---------|----------------|--------------|--------------|-----------------|---------------|
|                                                          |                | amino acid                 | amine | saturated fatty acid | unsaturated fatty acid | steroid | monosaccharide | disaccharide | nucleic acid | carboxylic acid | sugar alcohol |
|                                                          | total detected | 32                         | 5     | 11                   | 15                     | 3       | 16             | 16           | 2            | 7               | 4             |
| number of significant metabolites by ANOVA term (p<0.01) | Genetic        | 21                         | 3     | 8                    | 3                      | 2       | 5              | 10           | 2            | 3               | 3             |
|                                                          | Diet           | 7                          | 1     | 5                    | 3                      | 1       | 4              | 9            | 1            | 1               | 3             |
|                                                          | Genetic*Diet   | 2                          | 0     | 3                    | 1                      | 0       | 0              | 0            | 0            | 0               | 0             |
