# Supplementary material for: Metabolomic and Gene Expression Profiles Exhibit Modular Genetic and Dietary Structure Linking Metabolic Syndrome Phenotypes in Drosophila
Source: PubMed Central journal article supplement (PMC4683653; doi:10.1534/g3.115.023564), 2015-11-03
Supplement: supp_g3.115.023564_TableS3.pdf [file supp_g3.115.023564_TableS3.pdf]

Table S3. Genes with a significant GxD interaction effect (FDR 0.05)

| <u>Gene ID</u> | <u>Transcript ID</u> | <u>Module (Average Degree)</u> | <u>Degree</u> |
|----------------|----------------------|--------------------------------|---------------|
| Sgs8           | FBtr0076160          | 1 (0.76144)                    | 0.83629       |
| Sgs5           | FBtr0083461          | 1 (0.76144)                    | 0.81872       |
| Sgs7           | FBtr0076095          | 1 (0.76144)                    | 0.81845       |
| CG7587         | FBtr0083460          | 1 (0.76144)                    | 0.79294       |
| Sgs3           | FBtr0076096          | 1 (0.76144)                    | 0.77958       |
| CG15404        | FBtr0077578          | 1 (0.76144)                    | 0.7785        |
| CG12715        | FBtr0073750          | 1 (0.76144)                    | 0.76823       |
| Eig71Ee        | FBtr0075585          | 1 (0.76144)                    | 0.70617       |
| sens           | FBtr0075862          | 1 (0.76144)                    | 0.55409       |
| GRHR           | FBtr0079308          | 2 (0.55761)                    | 0.66928       |
| GRHR           | FBtr0079310          | 2 (0.55761)                    | 0.64346       |
| Acox57D-p      | FBtr0071606          | 2 (0.55761)                    | 0.36008       |
| CG15865        | FBtr0074375          | 3 (0.52629)                    | 0.61032       |
| CG13397        | FBtr0079711          | 3 (0.52629)                    | 0.57024       |
| CG8774         | FBtr0082740          | 3 (0.52629)                    | 0.56986       |
| CG3264         | FBtr0071781          | 3 (0.52629)                    | 0.56219       |
| Yp2            | FBtr0071424          | 3 (0.52629)                    | 0.31884       |
| CG14998        | FBtr0073265          | 4 (0.2491)                     | 0.36609       |
| CG5262         | FBtr0078230          | 4 (0.2491)                     | 0.34808       |
| tth            | FBtr0073849          | 4 (0.2491)                     | 0.34268       |
| CG1943         | FBtr0081635          | 4 (0.2491)                     | 0.34192       |
| CG2713         | FBtr0070497          | 4 (0.2491)                     | 0.32075       |
| CG11178        | FBtr0073804          | 4 (0.2491)                     | 0.30009       |
| CG17618        | FBtr0084306          | 4 (0.2491)                     | 0.29674       |
| Pi3K68D        | FBtr0076087          | 4 (0.2491)                     | 0.29545       |
| Lasp           | FBtr0100145          | 4 (0.2491)                     | 0.29369       |
| CG18445        | FBtr0088434          | 4 (0.2491)                     | 0.29239       |
| CG7348         | FBtr0074866          | 4 (0.2491)                     | 0.23131       |
| CG4133         | FBtr0078061          | 4 (0.2491)                     | 0.22822       |
| Tig            | FBtr0079275          | 4 (0.2491)                     | 0.22449       |
| eIF-4E         | FBtr0076490          | 4 (0.2491)                     | 0.21671       |
| CG18136        | FBtr0075040          | 4 (0.2491)                     | 0.21644       |
| comt           | FBtr0073754          | 4 (0.2491)                     | 0.20906       |
| CG13675        | FBtr0076730          | 4 (0.2491)                     | 0.20786       |

|         |             |            |         |
|---------|-------------|------------|---------|
| CG16762 | FBtr0072968 | 4 (0.2491) | 0.20217 |
| CG10909 | FBtr0082685 | 4 (0.2491) | 0.18481 |
| Smox    | FBtr0071192 | 4 (0.2491) | 0.18393 |
| CG10513 | FBtr0084865 | 4 (0.2491) | 0.17068 |
| sug     | FBtr0087789 | 4 (0.2491) | 0.14773 |
| Hpr1    | FBtr0078667 | 4 (0.2491) | 0.108   |
