# Supplementary material for: Metabolomic and Gene Expression Profiles Exhibit Modular Genetic and Dietary Structure Linking Metabolic Syndrome Phenotypes in Drosophila
Source: PubMed Central journal article supplement (PMC4683653; doi:10.1534/g3.115.023564), 2015-11-03
Supplement: supp_g3.115.023564_TableS4.pdf [file supp_g3.115.023564_TableS4.pdf]

Table S4. GO analysis of transcripts correlated with traits

| <u>Trait</u> | <u>Number of Transcripts Significant at FDR 0.05</u> | <u>Top GO Functional Categories (# of genes in cluster, enrichment score)</u>                                     | <u>Kegg Pathways</u>                                                   |
|--------------|------------------------------------------------------|-------------------------------------------------------------------------------------------------------------------|------------------------------------------------------------------------|
| Weight       | 479                                                  | Puparial Adhesion (10, 2.15)<br>Regulation of Protein Import Into Nucleus (5, 1.73)<br>Iron ion binding (21, 1.7) | Insect Hormone Biosynthesis<br>One Carbon Pool by Folate               |
| Triglyceride | 35                                                   | Instar larval or pupal morphogenesis (5, 2.04)                                                                    | Inositol phosphate metabolism<br>Phosphatidylinositol signaling system |
| Sugar        | 82                                                   | Oxidation Reduction (17, 4.0)                                                                                     | no sig                                                                 |
