# Supplementary material for: Metabolomic and Gene Expression Profiles Exhibit Modular Genetic and Dietary Structure Linking Metabolic Syndrome Phenotypes in Drosophila
Source: PubMed Central journal article supplement (PMC4683653; doi:10.1534/g3.115.023564), 2015-11-03
Supplement: supp_g3.115.023564_TableS5.pdf [file supp_g3.115.023564_TableS5.pdf]

Table S5. Stepwise forward regression of transcripts correlated with gross phenotypes.

| <u>Phenotype</u> | <u>Significance Threshold for Testing in Regression</u> | <u>Parameter</u> | <u>Estimate</u> | <u>Sum of Squares</u> | <u>P value</u> | <u>R Squared</u> |
|------------------|---------------------------------------------------------|------------------|-----------------|-----------------------|----------------|------------------|
| Weight           | Bonferroni                                              | FBtr0077671      | 0.035           | 0.073                 | 0.00059        | 0.56             |
|                  |                                                         | FBtr0079527      | 0.024           | 0.046                 | 0.00618        |                  |
|                  |                                                         | FBtr0080783      | -0.010          | 0.054                 | 0.00309        |                  |
|                  |                                                         | FBtr0081314      | -0.020          | 0.050                 | 0.00443        |                  |
|                  |                                                         | FBtr0085343      | 0.013           | 0.030                 | 0.02760        |                  |
|                  |                                                         | FBtr0086773      | 0.038           | 0.073                 | 0.00060        |                  |
|                  |                                                         | FBtr0091822      | 0.014           | 0.039                 | 0.01115        |                  |
|                  |                                                         | FBtr0100534      | 0.021           | 0.040                 | 0.01036        |                  |
|                  | Intercept                                               | 0.987            | 0.000           | 1.00000               |                |                  |
| Triglyceride     | FDR<0.05                                                | FBtr0072168      | 0.297           | 0.981                 | 0.00000        | 0.33             |
|                  |                                                         | FBtr0083716      | -0.073          | 0.243                 | 0.01008        |                  |
|                  |                                                         | FBtr0084486      | 0.071           | 0.590                 | 0.00008        |                  |
|                  |                                                         | FBtr0085350      | 0.095           | 0.299                 | 0.00439        |                  |
|                  |                                                         | FBtr0087157      | 0.026           | 0.223                 | 0.01366        |                  |
|                  |                                                         |                  | Intercept       | -0.324                | 0.000          |                  |
| Sugar            | FDR<0.01                                                | FBtr0076003      | 0.104           | 3.050                 | 0.00209        | 0.15             |
|                  |                                                         | FBtr0084450      | 0.412           | 3.075                 | 0.00201        |                  |
|                  |                                                         |                  | Intercept       | -0.793                | 0.000          |                  |
