# Supplementary material for: Metabolomic and Gene Expression Profiles Exhibit Modular Genetic and Dietary Structure Linking Metabolic Syndrome Phenotypes in Drosophila
Source: PubMed Central journal article supplement (PMC4683653; doi:10.1534/g3.115.023564), 2015-11-03
Supplement: supp_g3.115.023564_TableS6.pdf [file supp_g3.115.023564_TableS6.pdf]

Table S6. Correlations between traits and metabolites

| Target      | Likely Category           | Metabolite      |                       | Number of Correlated Traits | Trait Correlations (p<0.05) |              |       |
|-------------|---------------------------|-----------------|-----------------------|-----------------------------|-----------------------------|--------------|-------|
|             |                           | Likely ID       | Confirmed ID          |                             | Weight                      | Triglyceride | Sugar |
| Target_0176 | niacin                    |                 |                       | 2                           | -0.14                       |              | -0.16 |
| Target_0189 | nucleic acid              | uracil          | uracil                | 2                           | -0.18                       | -0.14        |       |
| Target_0325 | nucleic acid              | pyrimidinedione |                       | 2                           | -0.16                       |              | 0.21  |
| Target_0349 | carboxylic acid           | glutaric acid   |                       | 2                           | -0.19                       |              | 0.16  |
| Target_0426 | amine                     | cadaverine      |                       | 2                           | -0.21                       |              | 0.27  |
| Target_0526 | catecholamine-like        |                 |                       | 2                           | 0.21                        | 0.20         |       |
| Target_0533 | amino acid                | l-dopa          | l-dopa                | 2                           | 0.21                        |              | -0.14 |
| Target_0791 | amino acid                | endocannabinoid | arachidonoyl dopamine | 2                           | -0.21                       | -0.22        |       |
| Target_0057 | amino acid                | alanine         | alanine               | 1                           | -0.17                       |              |       |
| Target_0074 | amino acid                | glycine         | glycine               | 1                           |                             | -0.20        |       |
| Target_0094 | carboxylic acid           |                 |                       | 1                           |                             |              | -0.15 |
| Target_0125 | aminomonophosphate        |                 |                       | 1                           | -0.17                       |              |       |
| Target_0131 | amino acid                | glycine         | glycine               | 1                           | -0.23                       |              |       |
| Target_0162 | amino acid                | isoleucine      | isoleucine            | 1                           | 0.15                        |              |       |
| Target_0164 | amino acid                | isoleucine      | isoleucine            | 1                           | 0.14                        |              |       |
| Target_0167 | amino acid                | threonine       | threonine             | 1                           | 0.16                        |              |       |
| Target_0178 | amino acid                | norleucine      | norleucine            | 1                           | -0.13                       |              |       |
| Target_0240 | amide                     |                 |                       | 1                           | -0.21                       |              |       |
| Target_0246 | amine                     |                 |                       | 1                           | -0.18                       |              |       |
| Target_0256 | alcohol                   |                 |                       | 1                           |                             | 0.15         |       |
| Target_0302 | amino acid like           |                 |                       | 1                           | -0.15                       |              |       |
| Target_0305 | monosaccharide            | arabinofuranose |                       | 1                           | -0.17                       |              |       |
| Target_0316 | amino acid                | phenylalanine   | phenylalanine         | 1                           |                             |              | -0.15 |
| Target_0337 | amino acid                | asparagine      | asparagine            | 1                           |                             | -0.18        |       |
| Target_0370 | lactone                   |                 |                       | 1                           |                             | 0.14         |       |
| Target_0374 | saturated fatty acid      |                 |                       | 1                           | -0.13                       |              |       |
| Target_0401 | monosaccharide            | fructose        | fructose              | 1                           |                             |              | 0.16  |
| Target_0432 | monosaccharide            | fructose        | fructose              | 1                           |                             | -0.13        |       |
| Target_0456 | saturated fatty acid like |                 |                       | 1                           |                             | 0.15         |       |
| Target_0471 | sugar alcohol             | myo-inositol    | myo-inositol          | 1                           |                             |              | -0.17 |

|             |                          |                                                  |                                                  |   |       |       |       |
|-------------|--------------------------|--------------------------------------------------|--------------------------------------------------|---|-------|-------|-------|
| Target_0472 | saturated fatty acid     | Hexadecanoic acid                                |                                                  | 1 | 0.18  |       |       |
| Target_0524 | sugar alcohol            | scyllo-inositol                                  |                                                  | 1 |       | 0.20  |       |
| Target_0532 | sugar amide              |                                                  |                                                  | 1 | -0.15 |       |       |
| Target_0579 | no good hit              |                                                  |                                                  | 1 |       |       | -0.15 |
| Target_0595 | saturated fatty amide    | Nonamide                                         |                                                  | 1 |       |       | -0.19 |
| Target_0599 | unsaturated fatty acid   | linoleic acid, olenic acid, or petroselinic acid | linoleic acid, olenic acid, or petroselinic acid | 1 | 0.16  |       |       |
| Target_0618 | saturated fatty amide    | dimethyldecanamide                               |                                                  | 1 | 0.14  |       |       |
| Target_0640 | aromatic secondary amine |                                                  |                                                  | 1 | 0.15  |       |       |
| Target_0678 | sugar alcohol            |                                                  |                                                  | 1 | -0.26 |       |       |
| Target_0743 | amino acid               | aspartic acid-like                               |                                                  | 1 |       |       | 0.16  |
| Target_0779 | nucleoside               | adenosine                                        | adenosine                                        | 1 | -0.18 |       |       |
| Target_0784 | disaccharide             |                                                  |                                                  | 1 | 0.14  |       |       |
| Target_0793 | disaccharide             | trehalose                                        | trehalose                                        | 1 |       |       | 0.14  |
| Target_0854 | alkane                   | Eicosane                                         |                                                  | 1 |       |       | -0.17 |
| Target_0927 | alkane                   | tridecane                                        |                                                  | 1 |       | 0.15  |       |
| Target_1014 | disaccharide             |                                                  |                                                  | 1 | 0.16  |       |       |
| Target_1029 | ploysaccharide           | pentasaccharide                                  |                                                  | 1 |       | -0.20 |       |
| Target_1154 | sulfur containing        | sulfur containing amino acid                     |                                                  | 1 | 0.20  |       |       |
