# Supplementary material for: Metabolomic and Gene Expression Profiles Exhibit Modular Genetic and Dietary Structure Linking Metabolic Syndrome Phenotypes in Drosophila
Source: PubMed Central journal article supplement (PMC4683653; doi:10.1534/g3.115.023564), 2015-11-03
Supplement: supp_g3.115.023564_TableS7.pdf [file supp_g3.115.023564_TableS7.pdf]

Table S7. Stepwise forward regression of metabolites correlated with gross phenotypes

| <u>Phenotype</u> | <u>Parameter</u> | <u>Estimate</u> | <u>Sum of Squares</u> | <u>P value</u> | <u>R Squared</u> |
|------------------|------------------|-----------------|-----------------------|----------------|------------------|
| Weight           | Intercept        | 1.002           | 0.000                 | 1.00000        | 0.186            |
|                  | Target_0678      | -0.116          | 0.453                 | 0.00000        |                  |
|                  | Target_0472      | 0.021           | 0.085                 | 0.00498        |                  |
| Triglyceride     | Intercept        | 0.006           | 0.000                 | 1.00000        | 0.174            |
|                  | Target_0791      | -0.054          | 0.397                 | 0.00373        |                  |
|                  | Target_0524      | 0.046           | 0.254                 | 0.01982        |                  |
|                  | Target_0526      | 0.049           | 0.320                 | 0.00905        |                  |
|                  | Target_0074      | -0.045          | 0.284                 | 0.01389        |                  |
|                  | Target_1029      | -0.049          | 0.356                 | 0.00600        |                  |
| Sugar            | Intercept        | -1.025          | 0.000                 | 1.00000        | 0.102            |
|                  | Target_0426      | 0.177           | 5.430                 | 0.00017        |                  |
|                  | Target_0595      | -0.135          | 2.438                 | 0.01084        |                  |
