# Supplementary material for: Metabolomic and Gene Expression Profiles Exhibit Modular Genetic and Dietary Structure Linking Metabolic Syndrome Phenotypes in Drosophila
Source: PubMed Central journal article supplement (PMC4683653; doi:10.1534/g3.115.023564), 2015-11-03
Supplement: supp_g3.115.023564_TableS8.pdf [file supp_g3.115.023564_TableS8.pdf]

Table S8. GO analysis of genes overlapping traits

| <u>Trait1</u> | <u>Trait2</u> | <u># of shared transcripts (p-value threshold)</u> | <u>GO Functional Term (# of genes in category, p-value)</u>                                                                                                 | <u>KEGG Pathway</u>                                    |
|---------------|---------------|----------------------------------------------------|-------------------------------------------------------------------------------------------------------------------------------------------------------------|--------------------------------------------------------|
| Weight        | Sugar         | 147 (0.01)                                         | Oxidation Reduction (19, 2.3E-5)<br>branched chain family amino acid metabolic process (3, 1.9E-3)                                                          | Valine, leucine and isoleucine degradation (4, 7.6E-3) |
| Weight        | Triglyceride  | 66 (0.01)                                          | protein homooligomerization (2, 1.6E-2)                                                                                                                     | none                                                   |
| Triglyceride  | Sugar         | 93 (0.05)                                          | neuropeptide signaling pathway (3, 1.5E-2)<br>regulation of transcription (10, 1.9E-2)<br>structural constituent of chitin-based larval cuticle (3, 2.3E-2) | none                                                   |
