# Supplementary material for: Metabolomic and Gene Expression Profiles Exhibit Modular Genetic and Dietary Structure Linking Metabolic Syndrome Phenotypes in Drosophila
Source: PubMed Central journal article supplement (PMC4683653; doi:10.1534/g3.115.023564), 2015-11-03
Supplement: supp_g3.115.023564_TableS9.pdf [file supp_g3.115.023564_TableS9.pdf]

Table S9. GO category enrichment by diet for weight, triglyceride, and sugar

| Trait        | Diet       | Top GO Category                   | Genes in Category | p-value  |
|--------------|------------|-----------------------------------|-------------------|----------|
| Weight       | Normal     | transition metal ion binding      | 13                | 1.30E-02 |
|              | High Fat   | DNA binding                       | 48                | 9.40E-04 |
|              | Control    | nucleosome organization           | 8                 | 1.90E-06 |
|              | High Sugar | nucleosome organization           | 8                 | 3.20E-04 |
| Triglyceride | Normal     | ubiquitin-protein ligase activity | 2                 | 4.10E-02 |
|              | High Fat   | purine ribonucleotide binding     | 12                | 1.10E-04 |
|              | Control    | DNA binding/transcription factor  | 22                | 3.70E-03 |
|              | High Sugar | hemopoiesis                       | 3                 | 1.10E-02 |
| Sugar        | Normal     | oxidation reduction               | 9                 | 1.70E-03 |
|              | High Fat   | chromoprotein                     | 2                 | 1.80E-02 |
|              | Control    | cytoskeletal protein binding      | 9                 | 5.80E-05 |
|              | High Sugar | electron transport chain          | 3                 | 3.00E-02 |
