# Supplementary material for: Metabolomic and Gene Expression Profiles Exhibit Modular Genetic and Dietary Structure Linking Metabolic Syndrome Phenotypes in Drosophila
Source: PubMed Central journal article supplement (PMC4683653; doi:10.1534/g3.115.023564), 2015-11-03
Supplement: supp_g3.115.023564_TableS10.pdf [file supp_g3.115.023564_TableS10.pdf]

Table S10. Gene IDs for transcripts correlated with traits across multiple diets

| <u>Trait</u> | <u>Diets</u> | <u>Transcript ID</u> | <u>Gene ID</u>                                                                | <u>Gene Function</u>              |
|--------------|--------------|----------------------|-------------------------------------------------------------------------------|-----------------------------------|
| Weight       | 4            | FBtr0079527          | CG7106                                                                        | galactose binding                 |
|              |              | FBtr0083603          | Transcriptional adapter 2A; DNA-directed RNA polymerase II 16 kDa polypeptide | DNA binding/mRNA transcription    |
|              |              | FBtr0085650          | prolyl-4-hydroxylase-alpha EFB                                                | peptidyl-proline modification     |
| Triglyceride | 2 or more    | FBtr0072168          | CG3173                                                                        | unknown                           |
|              |              | FBtr0077023          | Cuticular protein 65Aw                                                        | structural constituent of cuticle |
|              |              | FBtr0079549          | CG7219                                                                        | endopeptidase inhibitor activity  |
|              |              | FBtr0084063          | modifier of mdq4                                                              | chromatin organization            |
| Sugar        | 2 or more    | FBtr0079387          | CG11322                                                                       | unknown                           |
