# Supplementary material for: Metabolomic and Gene Expression Profiles Exhibit Modular Genetic and Dietary Structure Linking Metabolic Syndrome Phenotypes in Drosophila
Source: PubMed Central journal article supplement (PMC4683653; doi:10.1534/g3.115.023564), 2015-11-03
Supplement: supp_g3.115.023564_TableS11.pdf [file supp_g3.115.023564_TableS11.pdf]

Table S11. GO category enrichment for genes correlated with weight on multiple diets

| Trait  | Number of Diets with Significance | Distinct GO Category               | Genes in Category | p-value  |
|--------|-----------------------------------|------------------------------------|-------------------|----------|
| Weight | 2 or more                         | nucleosome organization            | 6                 | 1.40E-05 |
|        |                                   | proteolysis                        | 11                | 3.40E-02 |
| Weight | 3 or more                         | regulation of histone modification | 2                 | 1.20E-02 |
|        |                                   | peptidyl-proline modification      | 2                 | 1.50E-02 |
