# Supplementary material for: Metabolomic and Gene Expression Profiles Exhibit Modular Genetic and Dietary Structure Linking Metabolic Syndrome Phenotypes in Drosophila
Source: PubMed Central journal article supplement (PMC4683653; doi:10.1534/g3.115.023564), 2015-11-03
Supplement: supp_g3.115.023564_TableS12.pdf [file supp_g3.115.023564_TableS12.pdf]

Table S12. Primers used in Fluidigm Q-PCR analysis

| Gene      | Forward                | Reverse                |
|-----------|------------------------|------------------------|
| Acox57D-p | GCGAGGAAGTGCTAAAGTTCAA | GCAGCATCTCCGACAAATCC   |
| Act5C     | ATGGGCCAGAAGGACTCGTA   | CGTGCTCAATGGGGTACTTCA  |
| Amyrel    | TGGATGCCGCCAAGCATA     | GGACGGGAGTTGTGAGGAAA   |
| CG11317   | ATGGCGGATGACGATGATGAC  | AACTGGCGGTGACAATGGAA   |
| CG12448   | TCCACAGAATGCGAAAGGAAC  | AAGCGGTAGCCAAAGGTACTA  |
| CG12824   | GCGATCGCCTACCTCATCATA  | CTGCATGGACGCTATGTGAAC  |
| CG13609   | ATCTACTCGCGGATCATCA    | TCCTGCAGTCGTTGCTAA     |
| CG13947   | GTGGGGACTGCCTCCAAA     | TGGATTCGGTGGTCGTTGAA   |
| CG14805   | GACGGCAAGGTGTTTGTCTTTA | CCACAAAGGCCTGGATTTCC   |
| CG15111   | TCGGTATTCCGTAACGTTCCA  | TTCCGGCTTGGTGAGATCAA   |
| CG15483   | TTGGTGCCCGACTATATGCA   | CACATGGACCAACGGTGAA    |
| CG15820   | CGGTGGAACAACTACAAGGAA  | CAACGGCCTGCTATGTGAC    |
| CG15865   | GCCAGGAACCTGCTCTTCAA   | CACGTCAACGTTCTCAAAGACC |
| CG17134   | TCTTCGGCATCCAGCACTTA   | ACAGGAAACCCGACAGACTAC  |
| CG17322   | CCCTCCACCTTGACAGACAC   | GGTATTGCAGTCCTCTCTTCCC |
| CG17806   | GAGCAACATCCTCAAGCTGAC  | TCCAGCAAGCAGGATAAGCA   |
| CG18477   | TTTACGGGCTGGGGAAAGAA   | TTGGACCACCGGCAATGATA   |
| CG18563   | CTAGCGGACCGAATGAGGAA   | AGACTGTTGGTCTCGTTGGAA  |
| CG2269    | TCTGCGGTGTTACCCAGATA   | AGTACTGATAGTCGCAGGCTAC |
| CG32212   | TCTGGCTTACTCTGCTCCTCTA | GATACTGGTGGCGGTCACA    |
| CG32335   | GCCCCTCTCGGAACTGAAA    | TAAATCCGGGCAAGCTTCCA   |
| CG34104   | AACGGAGGCCGCAACAA      | CCAGGACGCACTTGATCGAA   |
| CG3558    | ACCCAAAAGCGGAACCACTA   | ATGCACGTACGGGATAAGCA   |
| CG4891    | ATGGCGGAGGTCATAAGAACA  | TCCTGCCACTGATGCCTTTA   |
| CG5130    | CTCGGCGGTTGTATCATCAC   | AGCTACTCCGGAGCCATTTA   |
| CG5131    | TCTTGAGCGCCATGTTCCA    | AGCTAGGGCTTTGGACTTGAC  |
| CG5612    | GCCAATCACTTGCGTGGAAA   | ACGATGAGGCGATTACCAA    |
| CG7634    | GCACTGCGTAGTATTCGGTAC  | CTCCCATAACTTCCTCCACGTA |

|          |                         |                        |
|----------|-------------------------|------------------------|
| CG8311   | ACGGATGTCTTCAGCCTCA     | AGCGGCAGCAGTAGACATA    |
| CG8858   | GAAACTGGACCGAATGCAGAA   | CATCCGAGTCCGCATTTCC    |
| CG9139   | CTCGATGTGCTTCCGAGAAAA   | CGAGGAAGAGGATCCAGGAC   |
| CHKov1   | CGAAAAC TTTGTTGGCGATTCC | CGATAGCGGGGATTGTTGTAC  |
| Cp110    | ACTTGGACGGGCAGCCTATA    | TACTGGCCATGTCGGATCCC   |
| Cyp6d2   | ATCCCCATCGCTTCGATTCA    | CACCTTGGAGTTGACTTTTCCC |
| Fs       | CCCAACTGGAGGTCGCCTA     | ACGCAGGTCAATCCGTTCAA   |
| g        | CGCGGCATTAGGAACAACAA    | CAGCTCCTGTTTGATCTCCTCA |
| Gapdh1   | AGGCTGGCATTTCGCTGAA     | ATGACGCGGTTGGAGTAACC   |
| GstD9    | GCCACCGTTTCCACTTTTGAA   | TTGGCATTGTCGTACCACCTAA |
| Idgf5    | CGGTGGCCAACTGCTAAC      | GGTTGACGAAGTCCACGTTAC  |
| Lcp9     | ACGAGGAGGCTGATGTTGTA    | GGCGGAATATGGTTGGATA    |
| lola     | GTCGTCGCCGAAAAGTCC      | CTGTCTGCTGGAGGATTGAC   |
| Isn      | GTGCACCAGGAGATCACCAA    | TTGCCAGCTTGTGAACCA     |
| mAcR-60C | GACTCCAGCAAGAGATCAAACA  | CAGGTGTCATGGTCGTTTCC   |
| mthl9    | TCAAATCCTGGTGGGCCATTA   | CGAACTTGTATACGCGAGCATT |
| Picot    | TCTGGAGAGGCAGAGGAGTA    | CTCGCCATCCTGAGAGTCA    |
| SP555    | GAGGGCACACTCACCTTCTA    | AGAGCATAACGATGGGGTACA  |
| spel1    | AGCTGCAGGAGCATGTCAA     | CCATGTTGGGTCCCGTGATTA  |
| Yp2      | GCCCAACCTGAAGGAGGTTA    | GGGCTTGAAGACATGGTTGAA  |
